# Supplementary material for: SNPs near the cysteine proteinase cathepsin O gene (CTSO) determine tamoxifen sensitivity in ERα-positive breast cancer through regulation of BRCA1
Source: PLoS Genet. 2017 Oct 2;13(10):e1007031. doi: 10.1371/journal.pgen.1007031 (PMC5638617; doi:10.1371/journal.pgen.1007031)
Supplement: S1 Table — (XLSX) [file pgen.1007031.s002.xlsx]

## Sheet: Sheet1
Genotype for CTSO and ZNF423 SNPs in a panel of breast cancer cell lines.
	UCLA_Cell_Line_ID	Cell_Line_Name	callRate	hetRate	CTSO SNP rs10030044		ZNF423 rs8060157
1	BR001	CAMA-1	0.9536	0.247077	A	A	T	T
2	BR002	BT-20	0.94023	0.104777	C	A	T	T
3	BR003	184A1	0.95444	0.223595	A	A	C	C
4	BR004	184B5	0.95017	0.243395	A	A	C	C
5	BR005	MCF-10A	0.95695	0.261101	C	A	T	C
6	BR006	UACC-812	0.9281	0.188061	A	A	T	C
7	BR007	MDA-MB-175	0.92707	0.248985	0	0	T	C
8	BR008	MDA-MB-361	0.92714	0.204816	C	C	C	C
9	BR009	MDA-MB-415	0.93152	0.187663	0	0	T	C
10	BR010	MDA-MB-436	0.9315	0.120582	A	A	C	C
11	BR011	UACC-893	0.92523	0.173406	C	A	T	C
12	BR012	SUM-225	0.93285	0.189846	C	A	T	C
13	BR013	KPL-1	0.91496	0.194423	C	C	0	0
14	BR014	CAL-51	0.95664	0.264242	C	C	T	C
15	BR015	MDA-MB-134	0.92753	0.261052	A	A	C	C
16	BR016	MDA-MB-157	0.92198	0.134962	A	A	C	C
17	BR017	SUM-190	0.92895	0.166323	A	A	T	T
18	BR018	Hs578T	0.93693	0.154194	A	A	C	C
19	BR019	UACC-732	0.92433	0.191421	C	A	C	C
20	BR020	BT-474	0.93193	0.165002	A	A	T	T
21	BR021	BT-549	0.92289	0.119786	A	A	0	0
22	BR022	COLO-824	0.93995	0.189799	C	C	T	C
23	BR023	DU4475	0.93784	0.256834	A	A	0	0
24	BR024	EFM-19	0.92616	0.156235	A	A	C	C
25	BR025	EFM-192A	0.9284	0.190888	A	A	T	T
26	BR026	HCC1143	0.93553	0.109909	0	0	T	T
27	BR027	HCC1187	0.94519	0.0955649	C	C	T	T
28	BR028	HCC1395	0.94229	0.10503	C	C	T	C
29	BR029	HCC1419	0.94107	0.220935	A	A	T	T
30	BR030	HCC1500	0.91247	0.173569	C	C	0	0
31	BR031	HCC1569	0.91977	0.173099	C	C	C	C
32	BR032	HCC1806	0.93365	0.130412	C	C	T	C
33	BR033	HCC1937	0.93741	0.0942846	C	A	T	C
34	BR034	HCC1954	0.91629	0.181682	C	A	C	C
35	BR035	HCC202	0.93295	0.147537	A	A	0	0
36	BR036	HCC2218	0.93996	0.218934	C	A	0	0
37	BR037	HCC38	0.93104	0.127863	C	C	T	C
38	BR038	HCC70	0.91985	0.157877	A	A	C	C
39	BR039	MCF-7	0.90278	0.21762	C	A	T	C
40	BR040	MDA-MB-231	0.92509	0.187173	A	A	C	C
41	BR041	MDA-MB-435	0.9344	0.134362	A	A	T	T
42	BR042	MDA-MB-453	0.93507	0.205692	C	A	C	C
43	BR043	MDA-MB-468	0.90616	0.156657	A	A	C	C
44	BR044	SK-BR-3	0.90633	0.197268	A	A	T	C
45	BR045	T-47D	0.94107	0.133406	A	A	T	T
46	BR046	ZR-75-1	0.93284	0.154789	C	C	T	T
47	BR047	ZR-75-30	0.94249	0.251449	C	A	T	C
48	BR048	HCC1599	0.93591	0.152945	A	A	0	0
49	BR049	HCC2157	0.94373	0.167318	C	C	C	C
50	BR051	MCF-12A	0.93012	0.197381	C	A	0	0
51	BR052	MDA-MB-330	0.93371	0.165302	C	C	T	C
52	BR053	JIMT1	0.93503	0.130592	C	A	0	0
